# Supplementary material for: Phylogenetic and Evolutionary Studies of Grapevine Pinot Gris Virus Isolates from Canada
Source: MDPI journal article supplement (doi:10.3390/v15030735), 2023-03-12
Supplement: s1 [file s1]

## Supplementary data

### Manuscript Title: Phylogenetic and Evolutionary Studies of Grapevine Pinot Gris Virus

#### Isolates from Canada

| GPGV isolate | Accession no. | Symptoms     | Cultivar           | Location | Reference |
|--------------|---------------|--------------|--------------------|----------|-----------|
| S149         | MK514532      | Asymptomatic | Chardonnay         | USA      | [28]      |
| S148         | MK514531      | Symptomatic  | Sauvignon blanc    | USA      |           |
| S145         | MK514529      | Asymptomatic | Cabernet sauvignon | USA      |           |
| S142         | MK514528      | Asymptomatic | N/A                | USA      |           |
| S155         | MK514527      | Asymptomatic | N/A                | USA      |           |
| S111         | MK514526      | Symptomatic  | N/A                | USA      |           |
| S107         | MK514525      | Asymptomatic | Cabernet sauvignon | USA      |           |
| S123         | MK514524      | Asymptomatic | Cabernet sauvignon | USA      |           |
| S106         | MK514523      | Symptomatic  | Chardonnay         | USA      |           |
| S105         | MK514522      | Symptomatic  | Chardonnay         | USA      |           |
| S104         | MK514521      | Asymptomatic | Chardonnay         | USA      |           |
| S103         | MK514520      | Asymptomatic | Chardonnay         | USA      |           |
| S147         | MK514530      | Asymptomatic | Zinfandel          | USA      |           |
| S150         | MK514533      | Asymptomatic | Sauvignon Musque   | USA      |           |
| S335         | MK514534      | Symptomatic  | N/A                | USA      |           |
| fvg-ls1      | MH087439      | Asymptomatic | Pinot blanc        | Italy    | [33]      |
| fvg-ls6      | MH087440      | Asymptomatic | Pinot gris         | Italy    |           |
| fvg-ls7      | MH087441      | Symptomatic  | Pinot gris         | Italy    |           |
| fvg-ls8      | MH087442      | Asymptomatic | Pinot gris         | Italy    |           |
| fvg-ls12     | MH087443      | Symptomatic  | Tocai fruillano    | Italy    |           |
| fvg-ls13     | MH087444      | Asymptomatic | Tocai fruillano    | Italy    |           |
| fvg-ls14     | MH087445      | Symptomatic  | Pinot gris         | Italy    |           |
| fvg-ls15     | MH087446      | Asymptomatic | Pinot gris         | Italy    |           |
| fvg-ls17     | MH087447      | Asymptomatic | Glera              | Italy    |           |
| SK30-1       | KF686810      | Asymptomatic | Vetliner           | Slovakia | [23]      |
| SK13         | KF131425      | Asymptomatic | Unknown            | Slovakia |           |
| SK01         | KF131424      | Asymptomatic | Unknown            | Slovakia |           |
| SK30         | KF131423      | Asymptomatic | Vetliner           | Slovakia |           |
| PN           | KY706085      | Symptomatic  | Pinot gris         | France   | [14]      |
| Mer          | KM491305      | Symptomatic  | Merlot             | France   |           |
| 12G1110      | MH802023      | Symptomatic  | N/A                | Canada   | N/A       |
| SL13         | KY747493      | Asymptomatic | Bai-Ji-Xin         | Pakistan | [21]      |
| GR           | MT414711      | Symptomatic  | Makripodia         | Greece   | N/A       |
| TN           | KT894101      | Asymptomatic | Touriga Nacional   | USA      | [34]      |
| IT           | FR877530      | Symptomatic  | Pinot gris         | Italy    | [2]       |

|          |          |             |                  |               |      |
|----------|----------|-------------|------------------|---------------|------|
| Riesling | KX522755 | Symptomatic | Riesling         | Germany       | [15] |
| FEM01    | KU312039 | Symptomatic | Silene latifolia | Italy         | [46] |
| BC-1     | KU194413 | Symptomatic | Pinot gris       | BC,<br>Canada | [11] |

---

**Table S1:** Accession numbers, symptoms, cultivar, origin and reference of 38 GPGV isolates used for genome analysis and gene-specific analyses obtained from NCBI,

| <b>Name on graph</b> | <b>Accession number</b> | <b>Symptoms</b> | <b>Cultivar</b> | <b>Location</b> | <b>Reference</b> |
|----------------------|-------------------------|-----------------|-----------------|-----------------|------------------|
| ASG17 Italy          | KU845342                | Symptomatic     | Glera           | Italy           | [36]             |
| ASG18 Italy          | KU845343                | Asymptomatic    | Glera           | Italy           |                  |
| ASG19 Italy          | KU845344                | Symptomatic     | Glera           | Italy           |                  |
| ASG20 Italy          | KU845345                | Asymptomatic    | Glera           | Italy           |                  |
| ASG21 Italy          | KU845346                | Symptomatic     | Glera           | Italy           |                  |
| ASG22 Italy          | KU845347                | Asymptomatic    | Glera           | Italy           |                  |
| ASG23 Italy          | KU845348                | Symptomatic     | Glera           | Italy           |                  |
| ASG24 Italy          | KU845349                | Asymptomatic    | Glera           | Italy           |                  |
| ASG25 Italy          | KU845350                | Symptomatic     | Glera           | Italy           |                  |
| ASG26 Italy          | KU845351                | Asymptomatic    | Glera           | Italy           |                  |
| ASG27 Italy          | KU845352                | Symptomatic     | Glera           | Italy           |                  |
| ASG28 Italy          | KU845353                | Asymptomatic    | Glera           | Italy           |                  |
| ASG29 Italy          | KU845354                | Symptomatic     | Glera           | Italy           |                  |
| ASG30 Italy          | KU845355                | Asymptomatic    | Glera           | Italy           |                  |
| ASG31 Italy          | KU845356                | Symptomatic     | Glera           | Italy           |                  |
| ASG32 Italy          | KU845357                | Asymptomatic    | Glera           | Italy           |                  |
| ASG33 Italy          | KU845358                | Symptomatic     | Glera           | Italy           |                  |
| ASG34 Italy          | KU845359                | Asymptomatic    | Glera           | Italy           |                  |
| ASG35 Italy          | KU845360                | Symptomatic     | Glera           | Italy           |                  |
| ASG36 Italy          | KU845361                | Asymptomatic    | Glera           | Italy           |                  |
| ASG39 Italy          | KU845362                | Symptomatic     | Glera           | Italy           |                  |
| ASG40 Italy          | KU845363                | Asymptomatic    | Glera           | Italy           |                  |
| ASG41 Italy          | KU845364                | Symptomatic     | Glera           | Italy           |                  |
| ASG42 Italy          | KU845365                | Asymptomatic    | Glera           | Italy           |                  |
| ASG43 Italy          | KU845374                | Asymptomatic    | Glera           | Italy           |                  |
| ASG44 Italy          | KU845376                | Asymptomatic    | Glera           | Italy           |                  |
| ASG45 Italy          | KU845375                | Asymptomatic    | Glera           | Italy           |                  |
| ASG46 Italy          | KU845377                | Asymptomatic    | Glera           | Italy           |                  |
| ASG47 Italy          | KU845373                | Symptomatic     | Glera           | Italy           |                  |
| ASG48 Italy          | KU845372                | Symptomatic     | Glera           | Italy           |                  |
| ASG49 Italy          | KU845371                | Symptomatic     | Glera           | Italy           |                  |
| ASG50 Italy          | KU845370                | Symptomatic     | Glera           | Italy           |                  |
| ASG51 Italy          | KU845366                | Symptomatic     | Glera           | Italy           |                  |
| ASG52 Italy          | KU845369                | Symptomatic     | Glera           | Italy           |                  |
| ASG53 Italy          | KU845368                | Symptomatic     | Glera           | Italy           |                  |
| ASG54 Italy          | KU845367                | Symptomatic     | Glera           | Italy           |                  |
| RQ25 Spain           | MH019206                | Symptomatic     | Bobal           | Spain           | [26]             |
| RQ30 Spain           | MH019204                | Symptomatic     | Bobal           | Spain           |                  |
| RQ99 Spain           | MH019205                | Symptomatic     | Macabeo         | Spain           |                  |
| RQ106 Spain          | MH019203                | Asymptomatic    | Macabeo         | Spain           |                  |
| RQ108 Spain          | MH019207                | Symptomatic     | Macabeo         | Spain           |                  |
| RQ111 Spain          | MH019208                | Symptomatic     | Tintorena       | Spain           |                  |
| RQ113 Spain          | MH019209                | Asymptomatic    | Tintorena       | Spain           |                  |
| RQ115 Spain          | MH019210                | Symptomatic     | Tintorena       | Spain           |                  |
| RQ116 Spain          | MH019211                | Asymptomatic    | Bobal           | Spain           |                  |
| RQ117 Spain          | MH019212                | Symptomatic     | Bobal           | Spain           |                  |
| RQ125 Spain          | MH019213                | Asymptomatic    | Tintorena       | Spain           |                  |
| RQ136 Spain          | MH019214                | Symptomatic     | Bobal           | Spain           |                  |

|                   |          |              |                       |                |      |
|-------------------|----------|--------------|-----------------------|----------------|------|
| 1 Czech           | MW147697 | Symptomatic  | Sauvignon blanc / SO4 | Czech Republic | [5]  |
| 2 Czech           | MW147699 | Symptomatic  | Sauvignon blanc / SO4 | Czech Republic |      |
| 4 Czech           | MW147701 | Symptomatic  | Sauvignon blanc / SO4 | Czech Republic |      |
| 6 Czech           | MW147703 | Symptomatic  | Sauvignon blanc / SO4 | Czech Republic |      |
| 8 Czech           | MW147696 | Symptomatic  | Sauvignon blanc / SO4 | Czech Republic |      |
| MOLA10 Italy      | LN606702 | Asymptomatic | Supernova             | Italy          | [38] |
| MOLA6 Italy       | LN606703 | Asymptomatic | Supernova             | Italy          |      |
| MOLA3x3 Italy     | LN606704 | Asymptomatic | Supernova             | Italy          |      |
| MOLA14 Italy      | LN606705 | Asymptomatic | Supernova             | Italy          |      |
| MOLA1 Italy       | LN606706 | Asymptomatic | Supernova             | Italy          |      |
| 3T Italy          | LN606707 | Symptomatic  | Pinot gris            | Italy          |      |
| FI8AV Italy       | LN606708 | Symptomatic  | Traminer              | Italy          |      |
| FI7AV Italy       | LN606709 | Symptomatic  | Traminer              | Italy          |      |
| FI6AV Italy       | LN606710 | Symptomatic  | Traminer              | Italy          |      |
| FI4N Italy        | LN606711 | Asymptomatic | Traminer              | Italy          |      |
| FI4A Italy        | LN606712 | Symptomatic  | Traminer              | Italy          |      |
| FI3A Italy        | LN606713 | Symptomatic  | Traminer              | Italy          |      |
| BE5A Italy        | LN606714 | Symptomatic  | Traminer              | Italy          |      |
| BA-FA-P4 Italy    | LN606715 | Symptomatic  | Traminer              | Italy          |      |
| LBE-FA-P2 Italy   | LN606716 | Symptomatic  | Traminer              | Italy          |      |
| BE-ac- Italy      | LN606717 | Symptomatic  | Traminer              | Italy          |      |
| ZA505-9A Italy    | LN606719 | Symptomatic  | Pinot gris            | Italy          |      |
| NAV9181N Italy    | LN606718 | Asymptomatic | Pinot gris            | Italy          |      |
| ZA505-5A Italy    | LN606720 | Symptomatic  | Pinot gris            | Italy          |      |
| Italy             | LN606721 | Symptomatic  | Pinot gris            | Italy          |      |
| ZA505-3N Italy    | LN606722 | Symptomatic  | Pinot gris            | Italy          |      |
| BE-FA59-1A Italy  | LN606723 | Symptomatic  | Pinot gris            | Italy          |      |
| ZA505-2N          | LN606724 | Asymptomatic | Pinot gris            | Italy          |      |
| A505-2A           | LN606725 | Asymptomatic | Pinot gris            | Italy          |      |
| ZA505-1N Italy    | LN606726 | Asymptomatic | Pinot gris            | Italy          |      |
| ZA-PA-P4 Italy    | LN606727 | Symptomatic  | Pinot gris            | Italy          |      |
| ZA-PA-P1 Italy    | LN606728 | Symptomatic  | Pinot gris            | Italy          |      |
| ZA-PA-P2 Italy    | LN606729 | Asymptomatic | Pinot gris            | Italy          |      |
| ZA505-10N Italy   | LN606730 | Symptomatic  | Pinot gris            | Italy          |      |
| ZA505-9A 13 Italy | LN606731 | Symptomatic  | Pinot gris            | Italy          |      |

|                         |          |              |                    |          |      |
|-------------------------|----------|--------------|--------------------|----------|------|
| ZA505-8N Italy          | LN606732 | Asymptomatic | Pinot gris         | Italy    |      |
| ZA505-7N Italy          | LN606733 | Asymptomatic | Pinot gris         | Italy    |      |
| ZA505-7A Italy          | LN606734 | Symptomatic  | Pinot gris         | Italy    |      |
| ZA505-6N Italy          | LN606735 | Asymptomatic | Pinot gris         | Italy    |      |
| ZA505-6A Italy          | LN606736 | Symptomatic  | Pinot gris         | Italy    |      |
| LA-GO-P5 Italy          | LN606737 | Symptomatic  | Pinot gris         | Italy    |      |
| MER-FA-1A Italy         | LN606738 | Symptomatic  | Merlot             | Italy    |      |
| ALA-P4 Italy            | LN606739 | Symptomatic  | Pinot gris         | Italy    |      |
| ZA505-9N Italy          | LN606740 | Asymptomatic | Pinot gris         | Italy    |      |
| ZA6Nclorosi Italy       | LN606742 | Asymptomatic | Pinot gris         | Italy    |      |
| ZA505-8A Italy          | LN606741 | Symptomatic  | Pinot gris         | Italy    |      |
| Clair Algeri            | MT272732 | Asymptomatic | Clairette          | Algeria  | N/A  |
| F4P5.M44 Moldova        | LT719093 | Asymptomatic | Margaritar         | Moldova  | [20] |
| HUCSK8 Hungary          | MK953676 | Asymptomatic | Not found          | Hungary  | N/A  |
| HUCSK9s Hungary         | MK953677 | Asymptomatic | Not found          | Hungary  |      |
| CF-BR Brazil            | KY829001 | Asymptomatic | Cab Franc          | Brazil   | [9]  |
| ME-BR Brazil            | KY829002 | Asymptomatic | Merlot             | Brazil   |      |
| SK53 Slovakia           | KF134127 | Asymptomatic | Muller Thurgau     | Slovakia | [23] |
| KF134126 SK107 Slovakia | KF134126 | Asymptomatic | Alibernet          | Slovakia |      |
| SK56 Slovakia           | KF134129 | Asymptomatic | Vetliner           | Slovakia |      |
| SK312 Slovakia          | KF134128 | Asymptomatic | Vetliner           | Slovakia |      |
| S149 USA                | MK514532 | Asymptomatic | Chardonnay         | USA      | [28] |
| S148 USA                | MK514531 | Symptomatic  | Sauvignon blanc    | USA      |      |
| S145 USA                | MK514529 | Asymptomatic | Cabernet sauvignon | USA      |      |
| S142 USA                | MK514528 | Asymptomatic | Unknown            | USA      |      |
| S115 USA                | MK514527 | Asymptomatic | Unknown            | USA      |      |
| S111 USA                | MK514526 | Symptomatic  | Unknown            | USA      |      |
| S107 USA                | MK514525 | Asymptomatic | Cabernet sauvignon | USA      |      |
| S123 USA                | MK514524 | Asymptomatic | Cabernet Sauvignon | USA      |      |
| S106 USA                | MK514523 | Symptomatic  | Chardonnay         | USA      |      |
| S105 USA                | MK514522 | Asymptomatic | Chardonnay         | USA      |      |
| S104 USA                | MK514521 | Asymptomatic | Chardonnay         | USA      |      |
| S103 USA                | MK514520 | Asymptomatic | Chardonnay         | USA      |      |
| S147 USA                | MK514530 | Asymptomatic | Zinfandel          | USA      |      |

|                       |          |              |                  |          |            |
|-----------------------|----------|--------------|------------------|----------|------------|
| S150 USA              | MK514533 | Asymptomatic | S. Musque        | USA      |            |
| S335 USA              | MK514534 | Symptomatic  | Unknown          | USA      |            |
| Gr Greece             | MT414711 | Symptomatic  | Makripodia       | Greece   | N/A        |
| PN France             | KY706085 | Symptomatic  | Pinot gris       | France   | [14]       |
| 12G1110               |          | Asymptomatic | Unknown          | Canada   | [11]       |
| Canada                | MH802023 |              |                  |          |            |
| SL13 Pakistan         | KY747493 | Asymptomatic | Bai Ji Xin       | Pakistan | [21]       |
| TN USA                |          | Asymptomatic | Touriga Nacional | USA      | [34]       |
|                       | KT894101 |              |                  |          |            |
| BC-1 Canada           | KU194413 | Symptomatic  | Pinot gris       | BC       | [11]       |
| fvg-Is1               | MH087439 | Asymptomatic | Pinot blanc      | Italy    | [33]       |
| fvg-Is6 Italy         | MH087440 | Asymptomatic | Pinot gris       | Italy    |            |
| fvg-Is7 Italy         | MH087441 | Asymptomatic | Pinot gris       | Italy    |            |
| fvg-Is8 Italy         | MH087442 | Asymptomatic | Pinot gris       | Italy    |            |
| fvg-Is12 Italy        | MH087443 | Symptomatic  | Tocai Fruilano   | Italy    |            |
|                       |          |              |                  |          |            |
| fvg-Is13 Italy        | MH087444 | Asymptomatic | Tocai Fruilano   | Italy    |            |
|                       |          |              |                  |          |            |
| fvg-Is14 Italy        | MH087445 | Symptomatic  | Pinot gris       | Italy    |            |
| fvg-Is15              | MH087446 | Asymptomatic | Pinot gris       | Italy    |            |
| fvg-Is17              | MH087447 | Asymptomatic | Glera            | Italy    |            |
| IT Italy              |          | Symptomatic  | Pinot gris       | Italy    | [2]        |
|                       | FR877530 |              |                  |          |            |
|                       |          |              |                  |          |            |
| Riesling 25-3 Germany | KX522755 | Symptomatic  | Riesling         | Germany  | [15]       |
| Mer France            | KM491350 | Symptomatic  | Merlot           | France   | [14]       |
| FEM01 Italy           | KU312039 | Symptomatic  | Silene latifolia | Italy    | [46]       |
|                       |          |              |                  |          |            |
| SK30-1 Slovakia       | KF686810 | Asymptomatic | Vetliner         | Slovakia | [23]       |
| SK13 Slovakia         | KF131425 | Asymptomatic | Unknown          | Slovakia |            |
| SK01 Slovakia         | KF131424 | Asymptomatic | Unknown          | Slovakia |            |
| SK30 Slovakia         | KF131423 | Asymptomatic | Vetliner         | Slovakia |            |
| ON-1                  | OK558797 | Asymptomatic | Chardonnay       | Ontario  | This study |
| ON-2                  | OK558798 | Asymptomatic | Chardonnay       | Ontario  |            |
| ON-3                  | OK558799 | Asymptomatic | Chardonnay       | Ontario  |            |
| ON-4                  | OK558800 | Asymptomatic | Chardonnay       | Ontario  |            |
| ON-5                  | OK558801 | Asymptomatic | Chardonnay       | Ontario  |            |
| ON-6                  | OK558802 | Asymptomatic | Chardonnay       | Ontario  |            |
| ON-7                  | OK558803 | Asymptomatic | Chardonnay       | Ontario  |            |
| ON-8                  | OK558804 | Asymptomatic | Chardonnay       | Ontario  |            |
| ON-9                  | OK558805 | Asymptomatic | Chardonnay       | Ontario  |            |
| ON-10                 | OK558806 | Asymptomatic | Pinot noir       | Ontario  |            |
| ON-11                 | OK558807 | Asymptomatic | Pinot gris       | Ontario  |            |
| ON-12                 | OK558808 | Asymptomatic | Mourvèdre        | Ontario  |            |
| ON-13                 | OK558809 | Asymptomatic | Pinot gris       | Ontario  |            |

|      |          |              |                |                  |
|------|----------|--------------|----------------|------------------|
| BC-2 | OK558810 | Symptomatic  | Riesling       | British Columbia |
| BC-3 |          | Asymptomatic | Merlot         | British Columbia |
| BC-4 | OK558811 | Asymptomatic | Pinot gris     | British Columbia |
|      | OK558812 |              |                |                  |
| BC-5 | OK558813 | Asymptomatic | Cabernet franc | British Columbia |
| BC-6 |          | Asymptomatic | Cabernet franc | British Columbia |
| BC-7 | OK558815 | Asymptomatic | Cabernet franc | British Columbia |
| BC-8 |          | Asymptomatic | Cabernet franc | British Columbia |
| NS-1 | OK558816 | Asymptomatic | Vidal blanc    | Nova Scotia      |
| QC-1 | QC-1     |              |                |                  |
| QC-2 | QC-2     | Asymptomatic | N/A            | Quebec           |
| QC-3 | QC-3     | Asymptomatic | N/A            | Quebec           |
| QC-4 | QC-4     | Asymptomatic | N/A            | Quebec           |
| QC-5 | QC-5     | Asymptomatic | N/A            | Quebec           |

---

**Table S2:** Accession numbers, symptoms, cultivar, origin and references of 169 GPGV isolates used in MP-CP overlapping region analysis obtained from NCBI



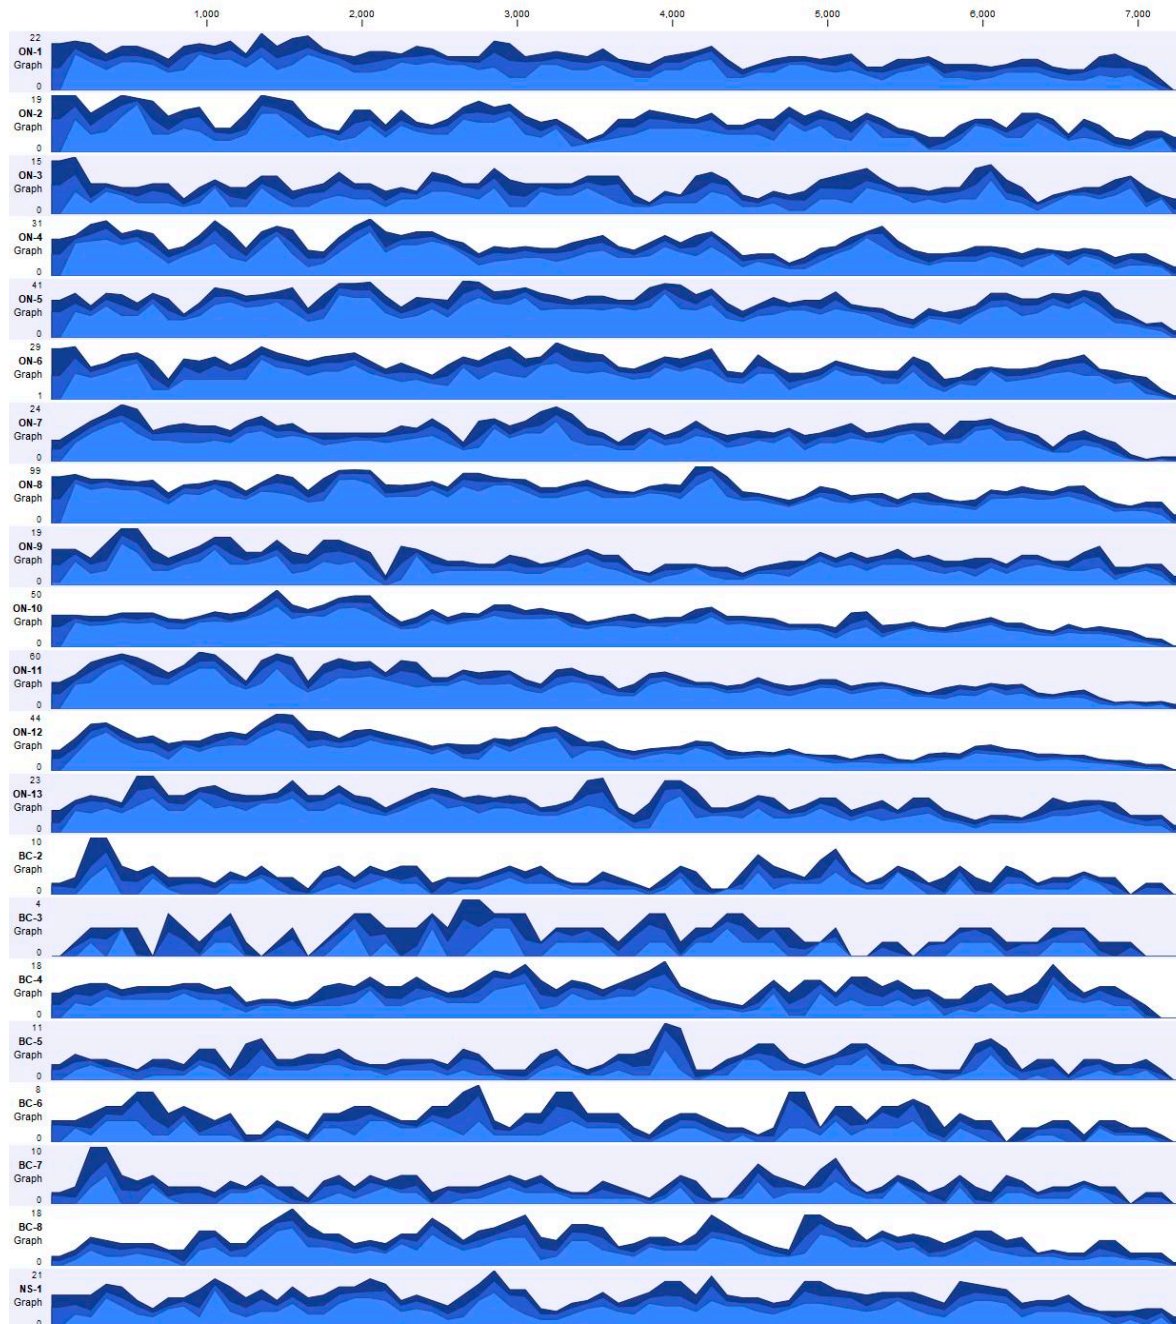

**Figure S1:** Depth and coverage of genome sequencing of Grapevine Pinot gris virus from 21 libraries comprised with CGW (CLC Genomics Workbench 20.0.4). Numbers on the top edge represent the length of the sequences while small numbers on the left edge represent depth. The blue area represents reads mapped on reference.

**Table S3:** Details on recombination events in Grapevine Pinot gris virus genome that were detected with seven methods using RDP4 software. Acronyms: R - Recombination Detection Program - RDP, G - GENECONV, B - Bootscan/Rescan, M - MaxChi, C - Chimaera, S - SisScan, T - 3Seq. Acronyms: R - Recombination Detection Program - RDP, G - GENECONV, B - Bootscan/Rescan, M - MaxChi, C - Chimaera, S - SisScan, T - 3Seq

| Event Number | Target   | Major parent | Minor Parent | Detection methods |                |                |                |                |                |                |
|--------------|----------|--------------|--------------|-------------------|----------------|----------------|----------------|----------------|----------------|----------------|
|              |          |              |              | R <sup>a</sup>    | G <sup>b</sup> | B <sup>c</sup> | M <sup>d</sup> | C <sup>e</sup> | S <sup>f</sup> | T <sup>g</sup> |
| 1            | fvg-Is8  | Unknown      | fvg-Is12     | +                 | +              | +              | +              | +              | +              | -              |
| 2            | fvg-Is14 | fvg-Is7      | fvg-Is12     | +                 | +              | +              | +              | +              | +              | +              |
| 3            | BC-5     | BC-8         | NS-1         | -                 | +              | +              | +              | +              | +              | +              |
| 4            | fvg-Is17 | FEM0         | fvg-Is12     | +                 | +              | -              | +              | +              | +              | +              |
| 5            | fvg-Is7  | PN           | fvg-Is1      | -                 | +              | +              | -              | -              | +              | -              |
| 6            | fvg-Is14 | Unknown      | fvg-Is7      | -                 | +              | +              | +              | -              | +              | -              |
| 7            | BC-8     | Unknown      | NS-1         | -                 | +              | +              | +              | +              | -              | -              |
| 8            | fvg-Is15 | FEM0         | ON10         | -                 | +              | -              | -              | -              | -              | -              |

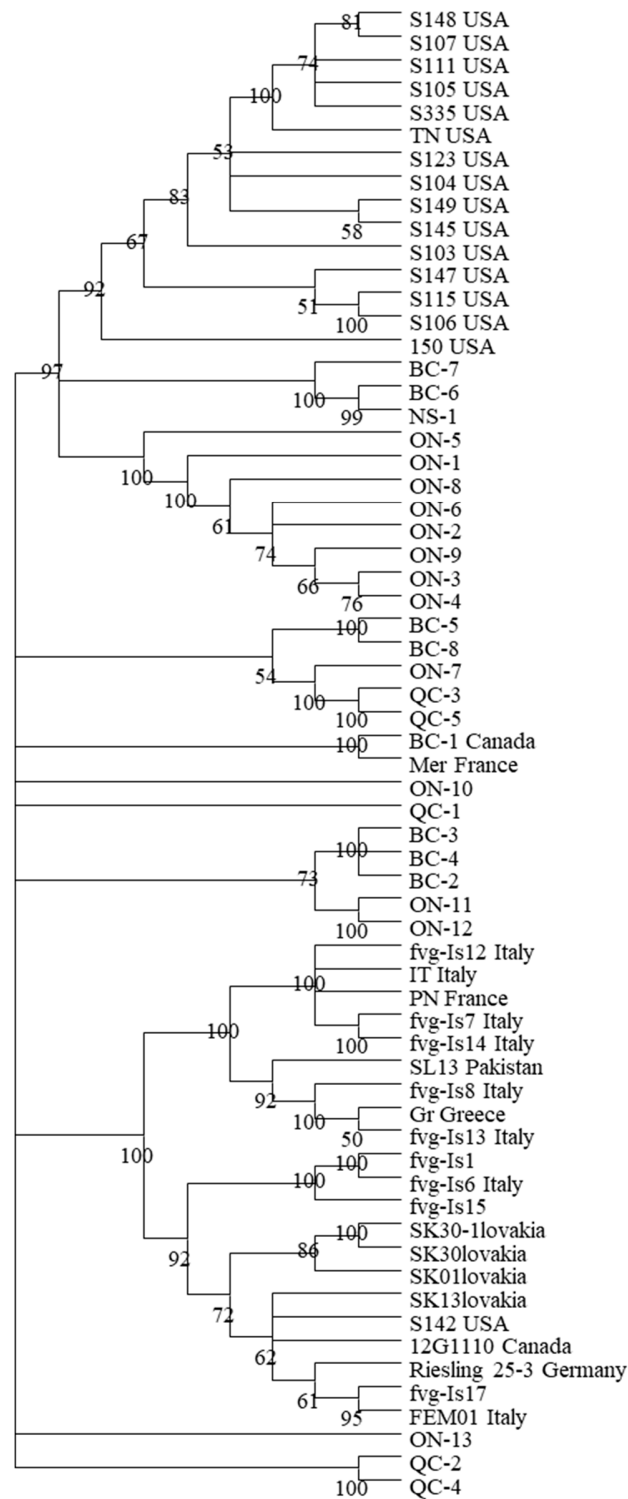

**Figure S2:** Unrooted maximum likelihood model for the largest recombination-free fragment for the 64 Grapevine Pinot gris virus isolates subjected in this study (4866bp, nt2293-nt7159 on

alignment). This tree was constructed with MEGA-X (General Time Reversal Model with discrete gamma distribution and invariant sites. Bootstrap value of 1000. Branches with less than 50% bootstrap consensus were collapsed. Details regarding this fragment and its breakpoints can be found in Table S3, S4 and S5.

**Table S4:** Details on recombination events in Grapevine Pinot gris virus genome that were detected with by seven methods using RDP4 software. The Even number column refers to the event number reported in Table S3 in the manuscript. Acronyms: R - Recombination Detection Program - RDP, G - GENECONV, B - Bootscan/Rescan, M - MaxChi, C - Chimaera, S - SisScan, T - 3Seq

| Event number | Isolates involved    | Beginning breakpoint | Ending breakpoint | p-values       |                |                |                |                |                |                |
|--------------|----------------------|----------------------|-------------------|----------------|----------------|----------------|----------------|----------------|----------------|----------------|
|              |                      |                      |                   | R <sup>a</sup> | G <sup>b</sup> | B <sup>c</sup> | M <sup>d</sup> | C <sup>e</sup> | S <sup>f</sup> | T <sup>g</sup> |
| 1            | fvg-Is8 and fvg-Is12 | 2228                 | 7172              | 1.38<br>E-7    | 4.09<br>E-10   | 2.90<br>E-14   | 5.59<br>E-8    | 2.06<br>E-8    | 3.02<br>E-12   | 5.75<br>E-21   |
| 2            | Fvg-Is12 & Fvg-Is14  | 2292                 | 7159              | 3.37<br>E-4    | 5.11<br>E-7    | 3.76<br>E-11   | 4.52<br>E-7    | 5.70<br>E-8    | 4.77<br>E-6    | 3.90<br>E-7    |
| 3            | BC-5, BC-8, NS-1     | 2196                 | 7192              | 7.53<br>E-5    | 5.22<br>E-6    | 1.78<br>E-10   | 8.25<br>E-11   | 8.55<br>E-3    | 4.31<br>E-13   | 7.73<br>E-15   |
| 4            | Fvg-Is17 & Fvg-Is12  | 879                  | 7171              | 2.24<br>E-4    | 1.11<br>E-7    | 4.20<br>E-11   | 6.66<br>E-7    | 5.70<br>E-8    | 2.77<br>E-6    | 6.91<br>E-7    |

**Table S5:** Recombination-free segments of genomes of grapevine Pinot gris virus isolates derived from predicted significant breakpoints. Details regarding the origin of these breakpoints can be found in table S4 above. Recombination-free genome fragments 200-bp sized or longer were reported in bold.

| Segment  | Beginning breakpoint | Ending breakpoint | Length (bp) |
|----------|----------------------|-------------------|-------------|
| <b>1</b> | <b>0</b>             | <b>896</b>        | <b>896</b>  |
| <b>2</b> | <b>897</b>           | <b>2195</b>       | <b>1298</b> |
| 3        | 2196                 | 2228              | 32          |
| 4        | 2229                 | 2292              | 63          |
| <b>5</b> | <b>2293</b>          | <b>7159</b>       | <b>4866</b> |
| 6        | 7160                 | 7162              | 2           |
| 7        | 7163                 | 7172              | 9           |
| 8        | 7173                 | 7289              | 116         |

**Table S6:** Estimates of evolutionary divergence over sequence pairs between clade for full genome of grapevine Pinot gris virus isolates using maximum likelihood model.

| Clade | Mean distance |        |        |        |
|-------|---------------|--------|--------|--------|
|       | 1             | 2      | 3      | 4      |
| 1     | N/A           | 0.0010 | 0.0017 | 0.0015 |
| 2     | 2.23%         | N/A    | 0.0015 | 0.0013 |
| 3     | 3.07%         | 3.04%  | N/A    | 0.0015 |
| 4     | 3.02%         | 2.93%  | 2.80%  | N/A    |

*The percentage number below the diagonal line represent the percentage of base substitutions per site from averaging over all sequence pairs between group.. Standard error estimate(s) are shown above the diagonal and were obtained by a bootstrap procedure (1000 replicates). Analyses were conducted using the Maximum Composite Likelihood model [1]. This analysis involved 63 nucleotide sequences. No preference on start codon position was selected. All ambiguous positions were removed for each sequence pair (pairwise deletion option). There were a total of 7289 positions in the final dataset. Evolutionary analyses were conducted in MEGA X [2]*

**Table S7:** Estimates of evolutionary divergence over sequence pairs within clade for the full genome of grapevine Pinot gris virus isolates using maximum likelihood model.

| Clade | Mean distance | Standard error |
|-------|---------------|----------------|
| 1     | 1.37%         | 0.0007         |
| 2     | 2.08%         | 0.0008         |
| 3     | 1.93%         | 0.0016         |
| 4     | 2.06%         | 0.0012         |

*The number of base substitutions per site from averaging over all sequence pairs within each group are shown. Standard error estimate(s) are shown in the second column and were obtained by a bootstrap procedure (1000 replicates). Analyses were conducted using the Maximum Composite Likelihood model [1]. This analysis involved 58 nucleotide sequences. No specific codon position was selected. All ambiguous positions were removed for each sequence pair (pairwise deletion option). There were a total of 7289 positions in the final dataset. Evolutionary analyses were conducted in MEGA X [2]*

**Table S8:** Estimates of evolutionary divergence over sequence pairs between clades for the largest recombination-free fragment of grapevine Pinot gris virus using maximum likelihood model.

| Clade | Mean distance |        |        |        |
|-------|---------------|--------|--------|--------|
|       | 1             | 2      | 3      | 4      |
| 1     | N/A           | 0.0012 | 0.0017 | 0.0018 |
| 2     | 2.02%         | N/A    | 0.0017 | 0.0018 |
| 3     | 2.87%         | 2.85%  | N/A    | 0.0017 |
| 4     | 3.05%         | 2.98%  | 3.01%  | N/A    |

*The percentage number below the diagonal line represent the percentage of base substitutions per site from averaging over all sequence pairs between group.. Standard error estimate(s) are shown above the diagonal and were obtained by a bootstrap procedure (1000 replicates). Analyses were conducted using the Maximum Composite Likelihood model [1]. This analysis involved 64 nucleotide sequences. No preference on start codon position was selected. All ambiguous positions were removed for each sequence pair (pairwise deletion option). There were a total of 4868 positions in the final dataset. Evolutionary analyses were conducted in MEGA X [2]*

**Table S9:** Estimates of evolutionary divergence over sequence pairs within clade for the largest recombination-free grapevine Pinot gris virus fragment using the maximum likelihood model.

| Clade | Mean distance | Standard error |
|-------|---------------|----------------|
| 1     | 1.31%         | 0.0007         |
| 2     | 1.80%         | 0.0010         |
| 3     | 1.88%         | 0.0017         |
| 4     | 2.08%         | 0.0015         |

*The number of base substitutions per site from averaging over all sequence pairs within each group are shown. Standard error estimate(s) are shown in the second column and were obtained by a bootstrap procedure (1000 replicates). Analyses were conducted using the Maximum Composite Likelihood model [1]. This analysis involved 64 nucleotide sequences. No specific codon position was selected. All ambiguous positions were removed for each sequence pair (pairwise deletion option). There were a total of 4868 positions in the final dataset. Evolutionary analyses were conducted in MEGA X [2]*

**Table S10:** Estimates of evolutionary divergence over sequence pairs between clade for MP-CP region of grapevine Pinot gris virus using maximum likelihood model.

| Clade | 1    | 2      |
|-------|------|--------|
| 1     | N/A  | 0.0067 |
| 2     | 4.4% | N/A    |

*The number of base substitutions per site from averaging over all sequence pairs between groups are shown. Standard error estimate(s) are shown above the diagonal and were obtained by a bootstrap procedure (1000 replicates). Analyses were conducted using the Maximum Composite Likelihood model [1]. This analysis involved 168 nucleotide sequences. No preference on start codon position was selected. All ambiguous positions were removed for each sequence pair (pairwise deletion option). There were a total of 549 positions in the final dataset. Evolutionary analyses were conducted in MEGA X [2]*

**Table S11:** Estimates of evolutionary divergence over sequence pairs within clade for MP-CP regions of grapevine Pinot gris virus using maximum likelihood model.

| <b>Clade</b> | <b>Mean distance</b> | <b>Standard error</b> |
|--------------|----------------------|-----------------------|
| <b>1</b>     | 2.30%                | 0.0029                |
| <b>2</b>     | 3.10%                | 0.0041                |

*The number of base substitutions per site from averaging over all sequence pairs within each group are shown. Standard error estimate(s) are shown in the second column and were obtained by a bootstrap procedure (1000 replicates). Analyses were conducted using the Maximum Composite Likelihood model [1]. This analysis involved 168 nucleotide sequences. No preference on start codon position was selected. All ambiguous positions were removed for each sequence pair (pairwise deletion option). There were a total of 549 positions in the final dataset. Evolutionary analyses were conducted in MEGA X [2]*
